# Supplementary material
Source: publisher figshare collection journal article supplement (https://tandf.figshare.com/ndownloader/files/20025032)
Supplement: Supplementary file 1 [file 20025032]

**Figure 1. Cost-utility of QALY gain in main analysis (EM) after bootstrapping (n = 2500) comparing EMDR and PE to WL: ICUR planes and acceptability curves.**

| **EMDR vs WL:** societal costs and QALY gain  Q3 =0.8%  Q4 = 97.4 %  Q1 = 1.8%  Q2 = 0.0% | **PE vs WL:** societal costs and QALY gain.  Q1 = 30.1%  Q4 = 69.4%  Q3 =0.4%  Q2 =0.1% |
| --- | --- |
| **EMDR vs WL:** cost-utility acceptability curve and QALY  **Probability of PE being cost-effective**  **Probability of EMDR being cost-effective** | **PE vs WL:** cost-utility acceptability curve and QALY |

Abbreviations: CAU, care as usual; EMDR, eye movement desensitization and reprocessing; ICUR, incremental cost-utility ratio; PE, prolonged exposure; QALY, Quality Adjusted Life Year; Q1, Quadrant 1 (more effective, more expensive); Q2, Quadrant 2 (the inferior quadrant: less effective, more expensive); Q3, Quadrant 3 (less effective, less expensive); Q4, Quadrant 4 (the dominant quadrant: more effective, less expensive); WL, waiting list.
